# Supplementary material for: Observation of Weibull, Lognormal, and Gamma Distributions in Electrodeposited Cu and Cu-Ag Particles
Source: Preprints.org preprint supplement (doi:10.20944/preprints202308.1598.v1), 2023-08-23
Supplement: Supplementary file 1 [file supplementary]

**Supplemental Material (Appendix)**

**Observation of Weibull, Lognormal, and Gamma distributions in electrodeposited Cu and Cu-Ag particles**

Yunkai Sun<sup>a\*</sup>, Giovanni Zangari<sup>a</sup>

a. Department of Materials Science and Engineering, University of Virginia, Charlottesville, VA, 22904, USA

\* Corresponding authors. Yúnkāi Sūn, Email: [ys3ej@virginia.edu](mailto:ys3ej@virginia.edu); Giovanni Zangari, Email: [gz3e@virginia.edu](mailto:gz3e@virginia.edu)

Appendix-A SEM images and Voronoi cells of the grains

1mM Ag(I) + 10mM Cu(II), -0.85 V<sub>SHE</sub>, 5s

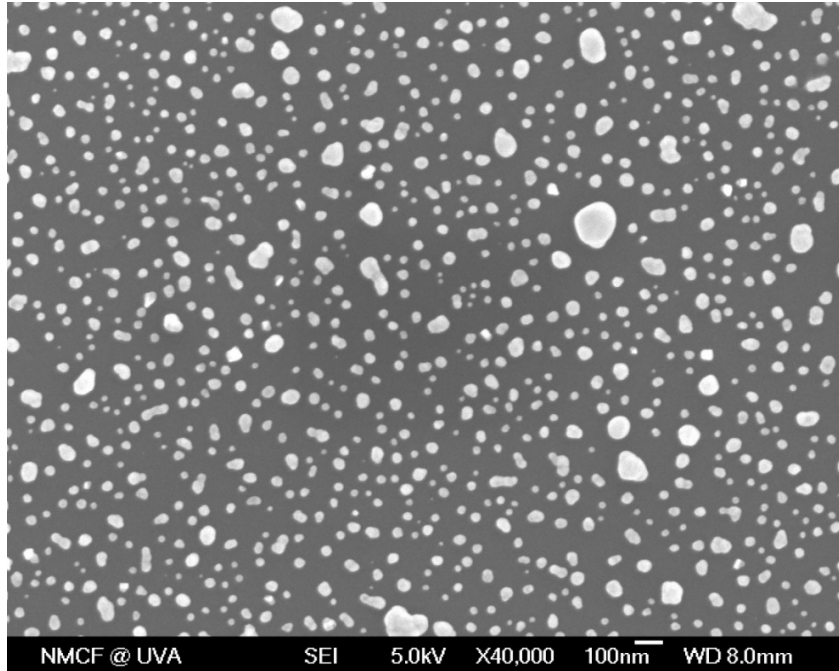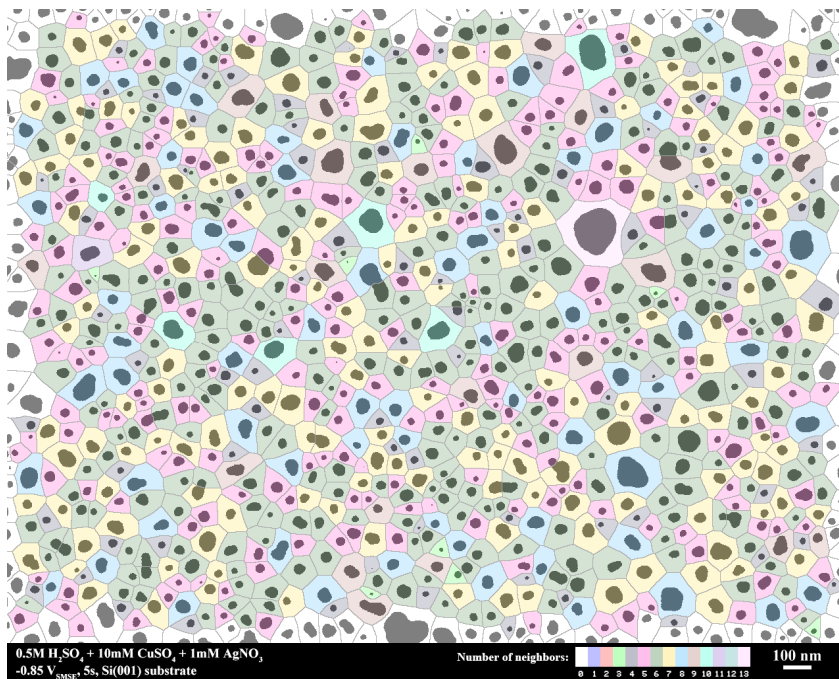

0.1mM Ag(I) + 10mM Cu(II), -0.85 V<sub>SHE</sub>, 5s

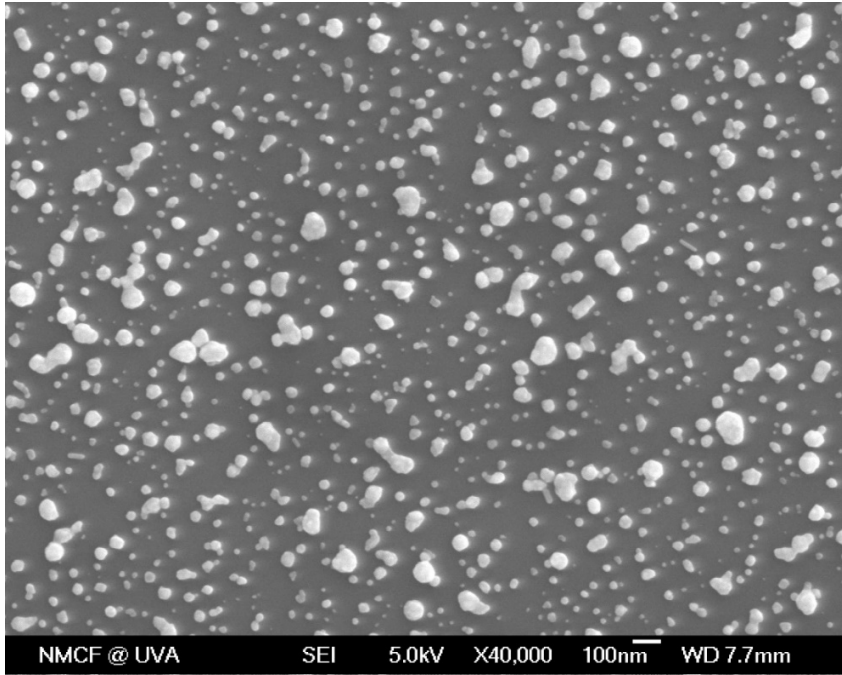

NMCF @ UVA SEI 5.0kV X40,000 100nm WD 7.7mm

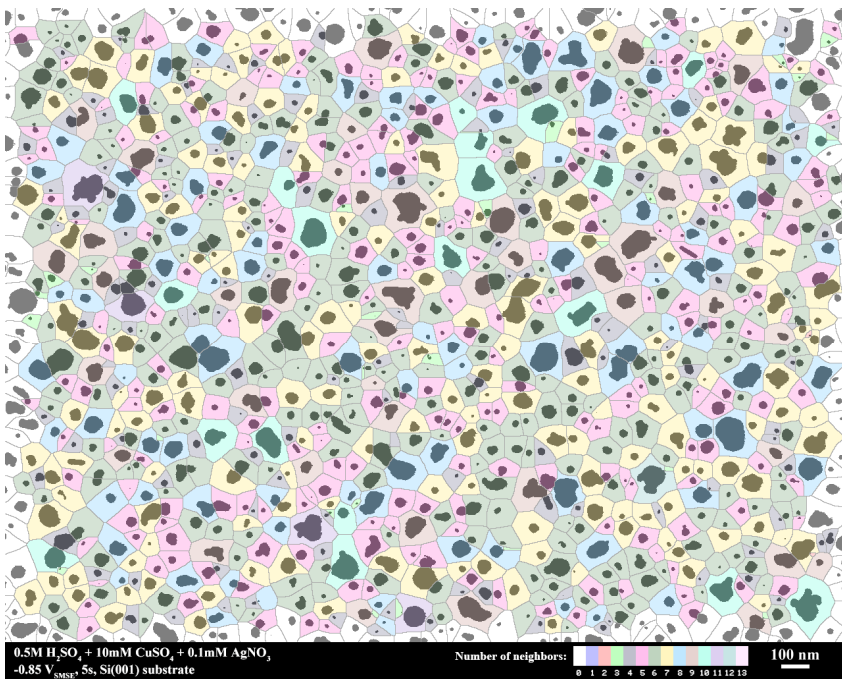

0.1mM Ag(I) + 10mM Cu(II), -0.90 V<sub>SHE</sub>, 5s

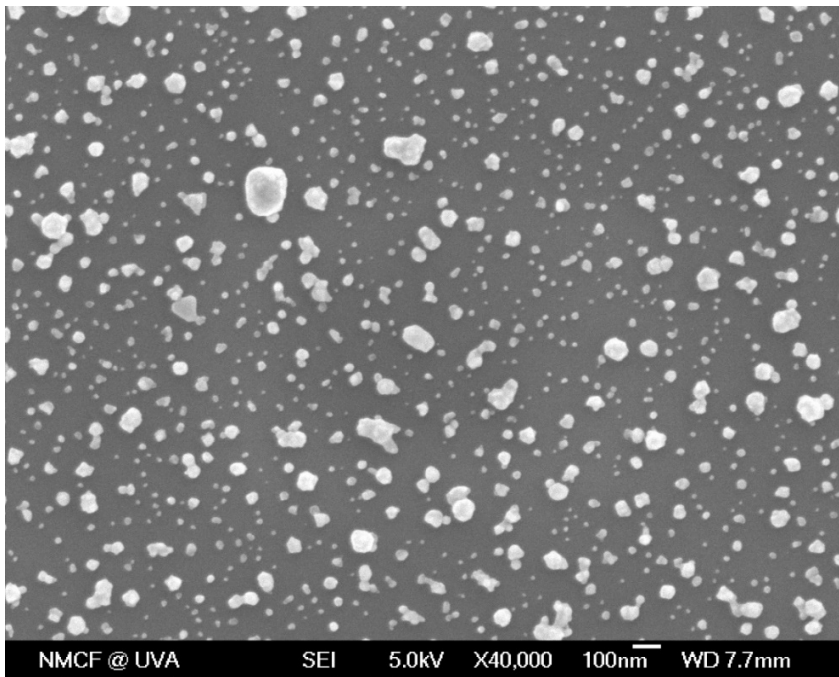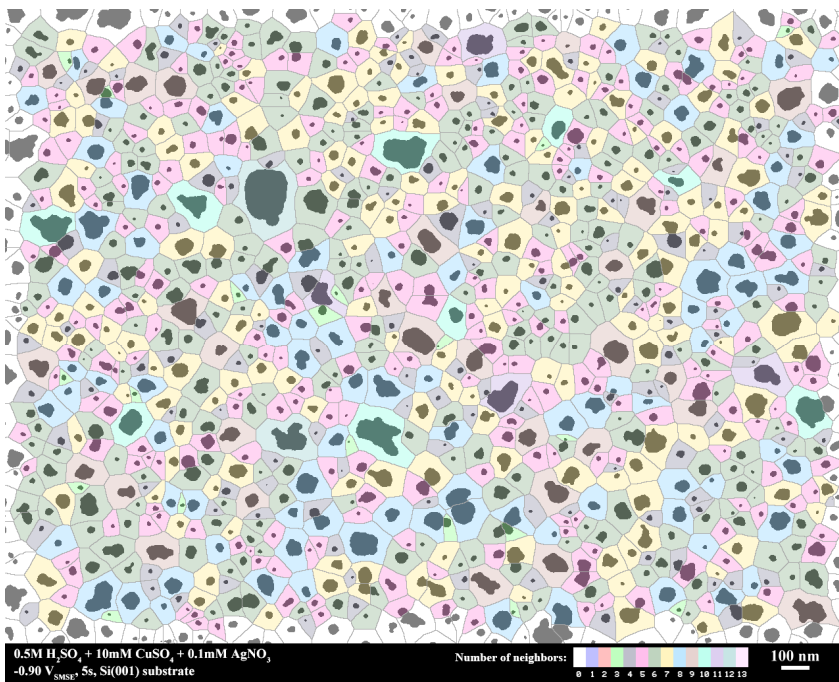

0.1mM Ag(I) + 10mM Cu(II), -0.95 V<sub>SHE</sub>, 5s

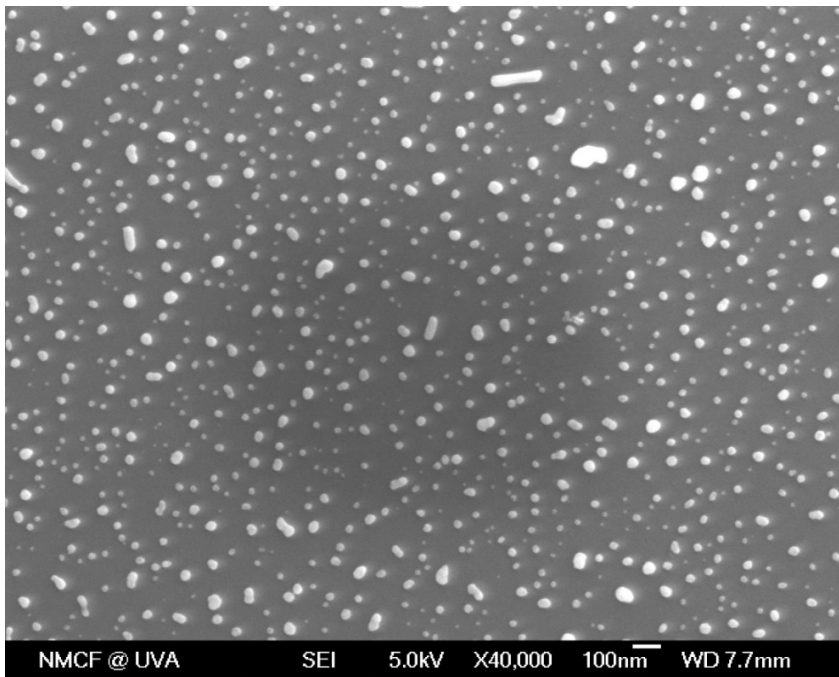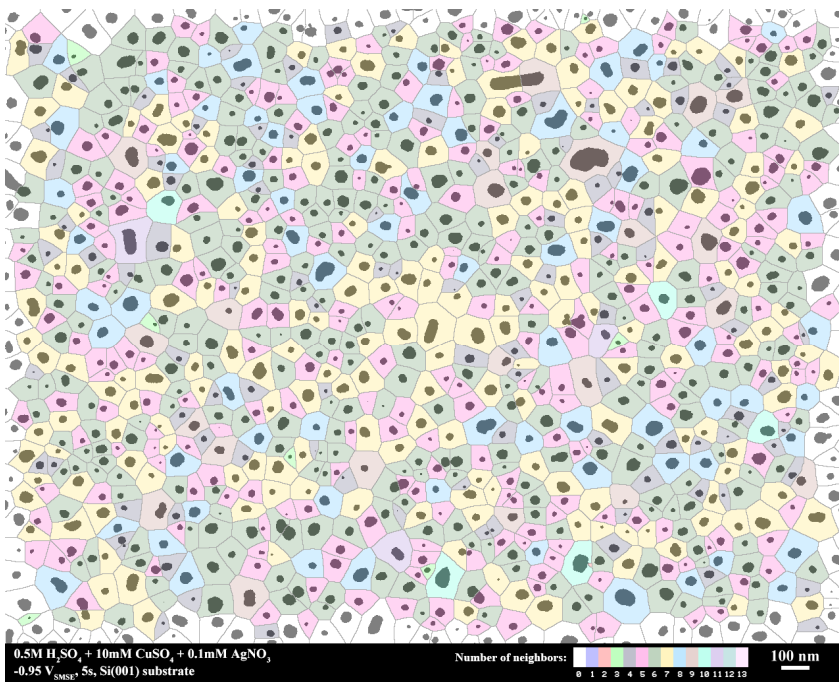

0.1mM Ag(I) + 10mM Cu(II), -1.00 V<sub>SHE</sub>, 5s

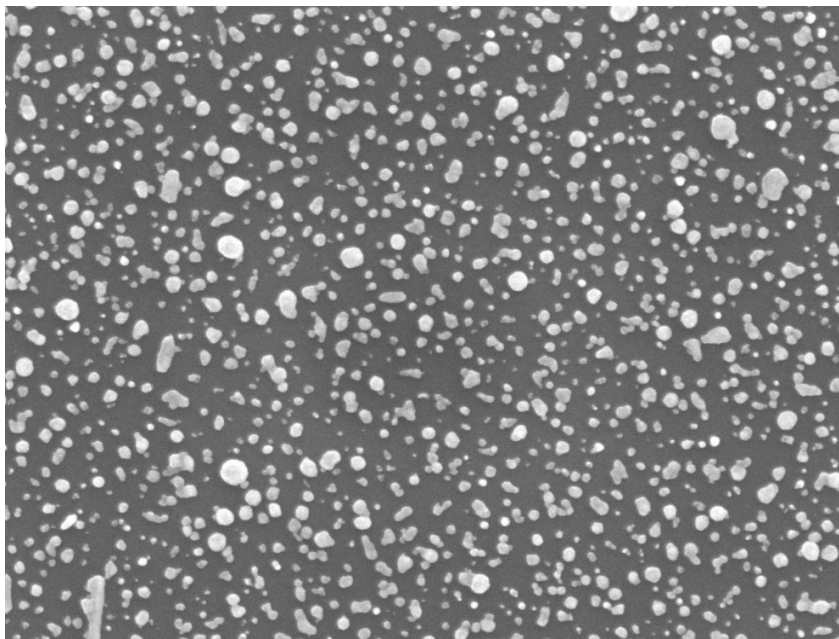

NMCF @ UVA SEI 5.0kV X40,000 100nm WD 7.5mm

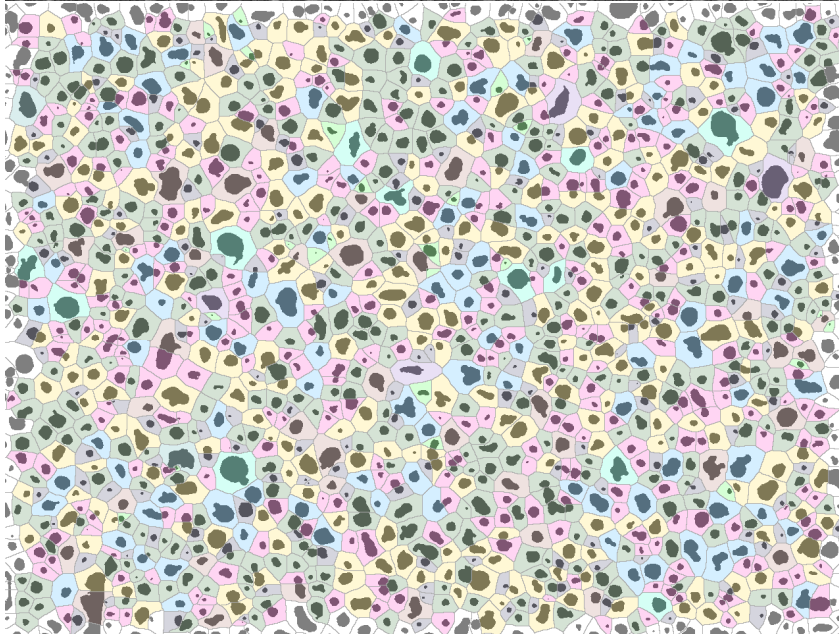

0.5M H<sub>2</sub>SO<sub>4</sub> + 10mM CuSO<sub>4</sub> + 0.1mM AgNO<sub>3</sub>,  
-1.00 V<sub>SSE</sub>, 5s, Si(001) substrate  
Number of neighbors: 0 1 2 3 4 5 6 7 8 9 10 11 12 13 100 nm

10mM Cu(II), -0.85 V<sub>SHE</sub>, 5s

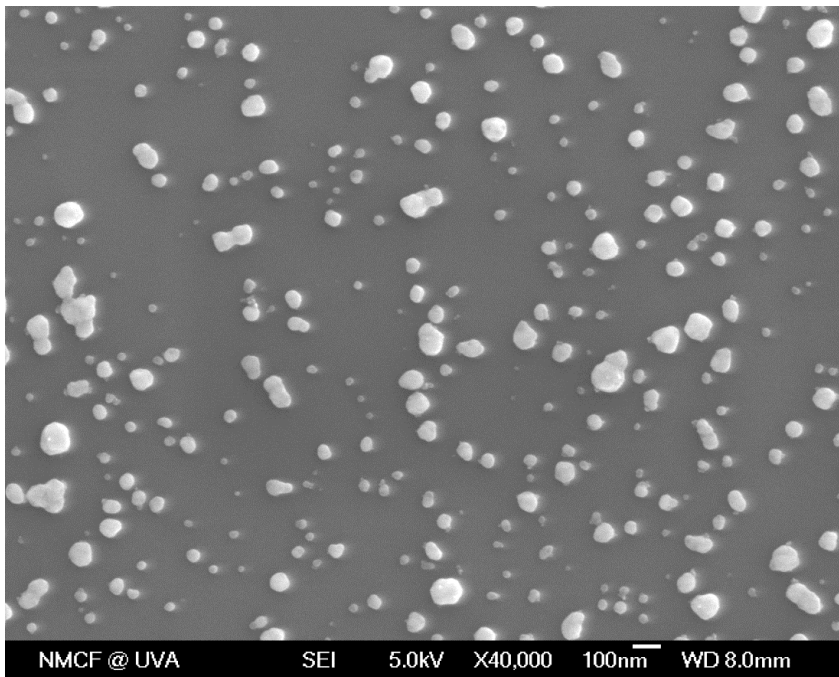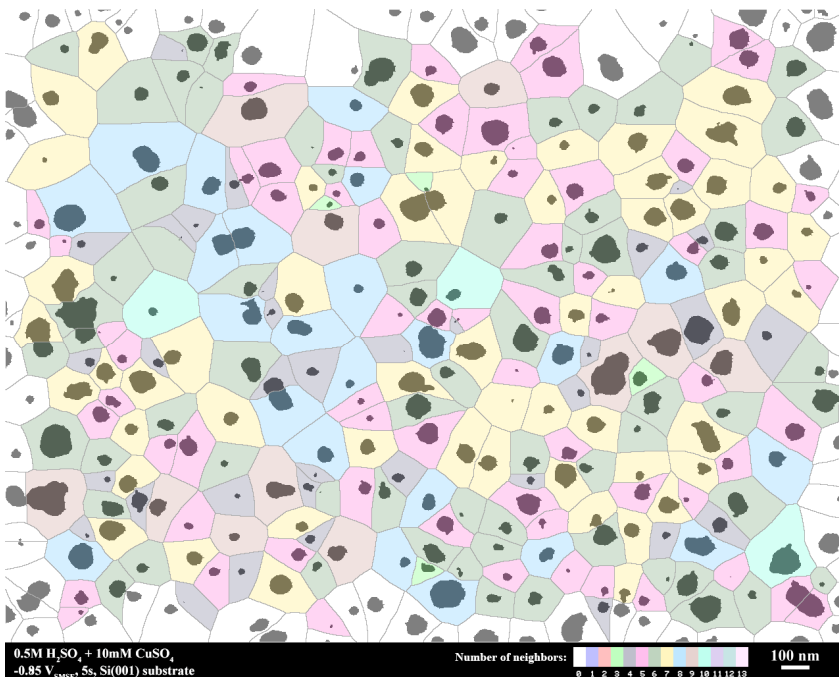

10mM Cu(II), -0.90 V<sub>SHE</sub>, 5s

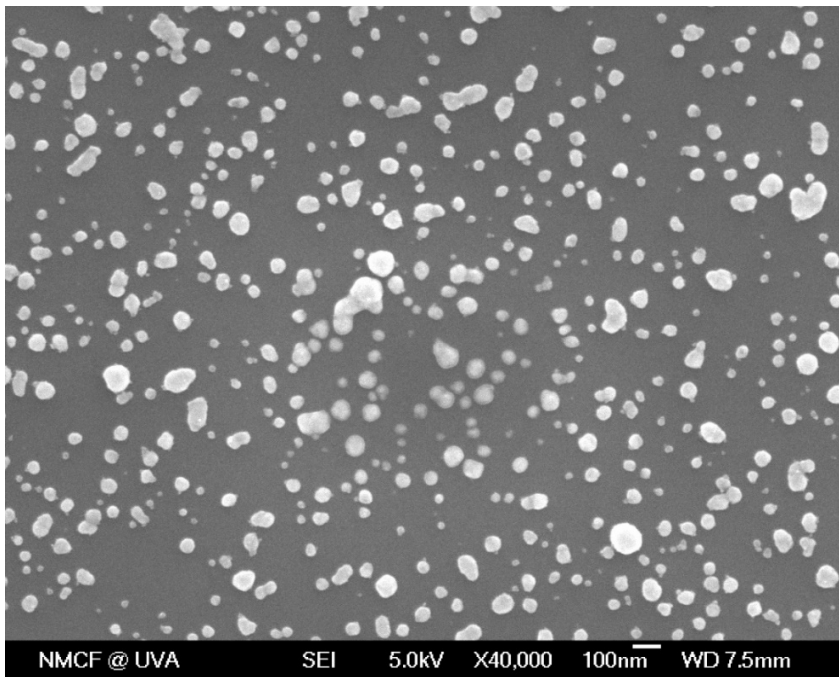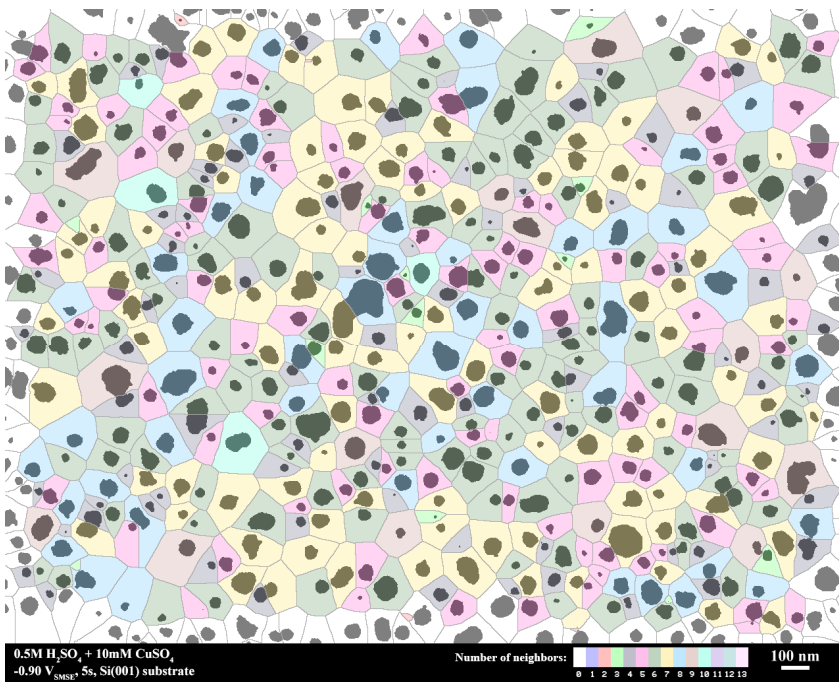

10mM Cu(II), -0.95 V<sub>SHE</sub>, 5s

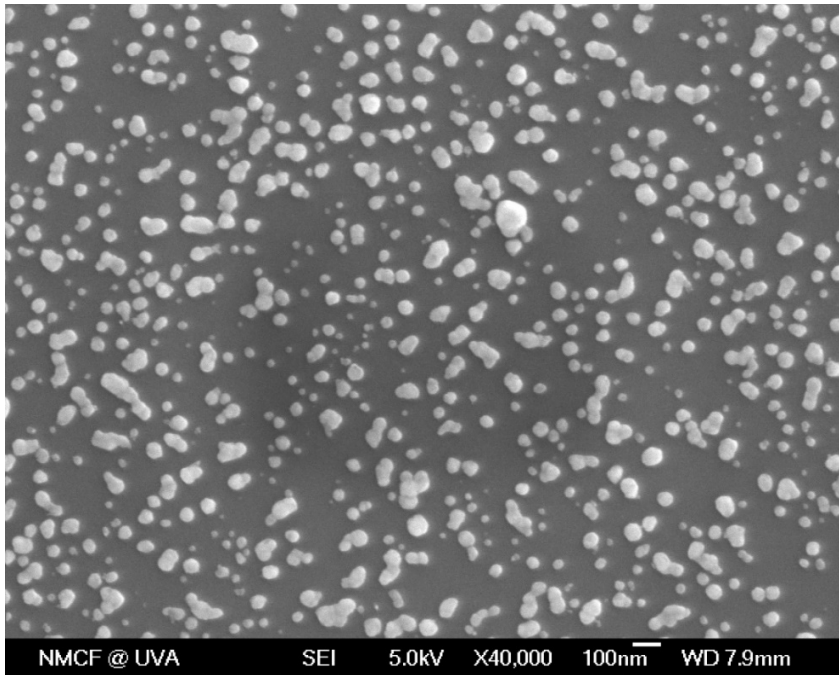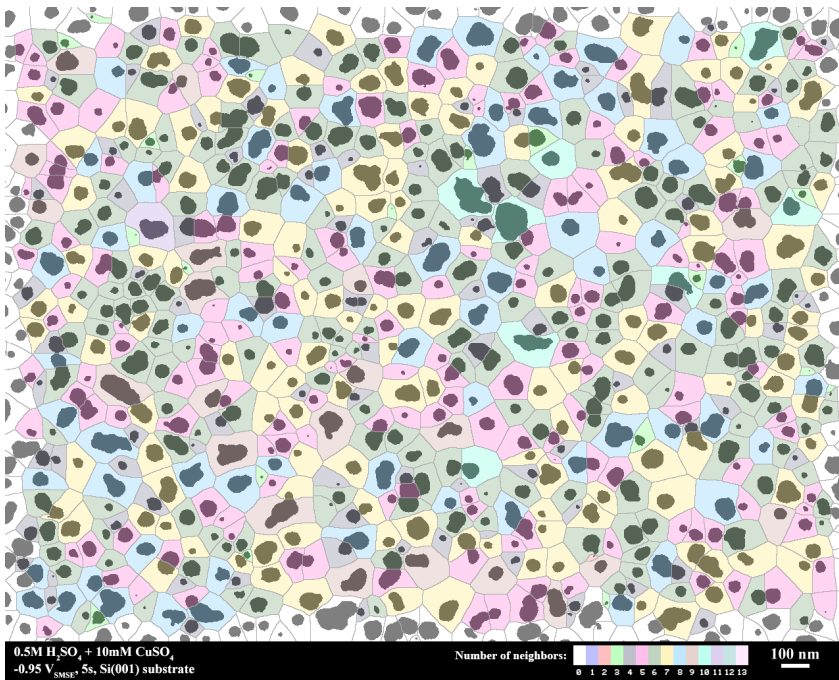

10mM Cu(II), -1.00 V<sub>SHE</sub>, 5s

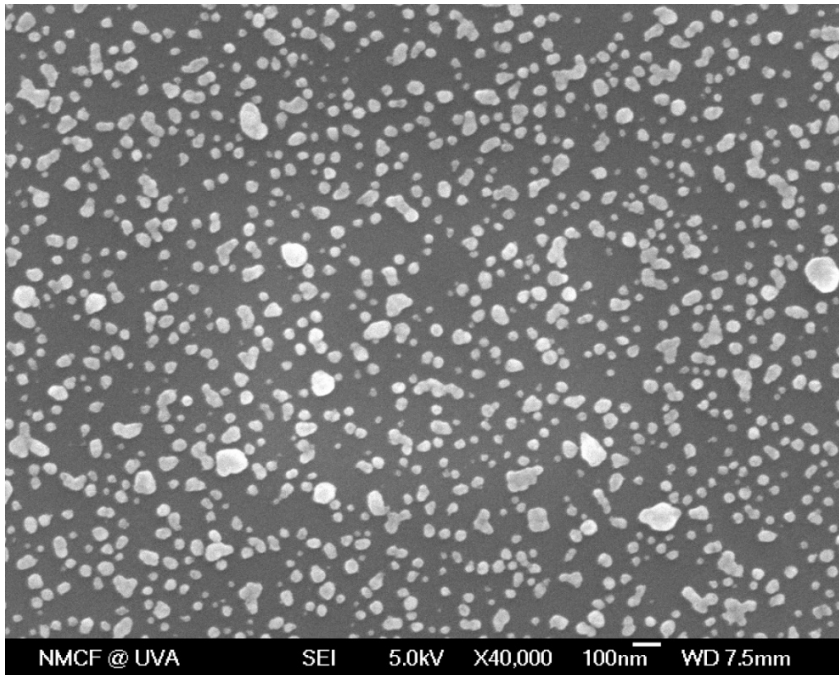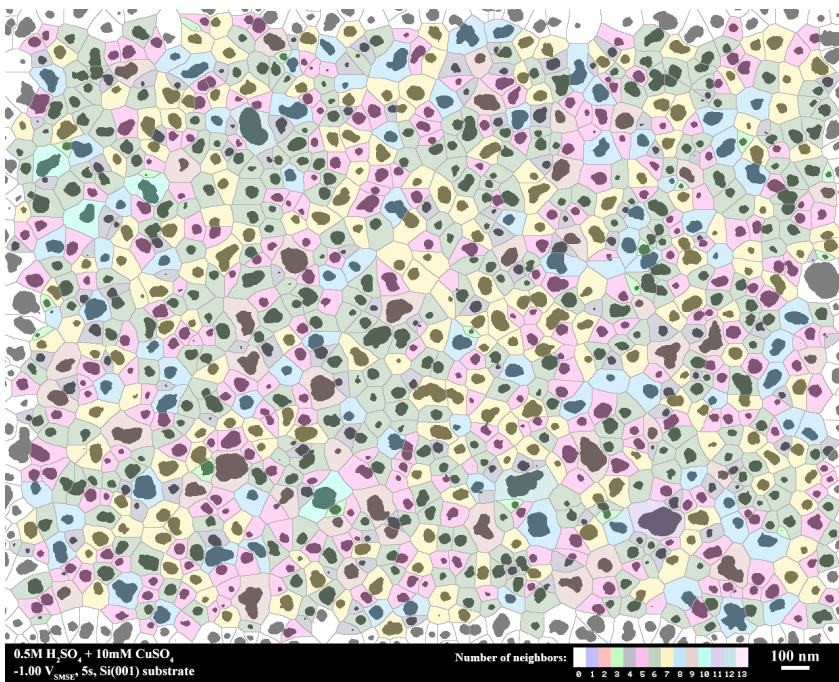

Appendix-B Comments on the Generalized Gamma distribution, the Lognormal distribution, the Weibull distribution, and the Gamma distribution

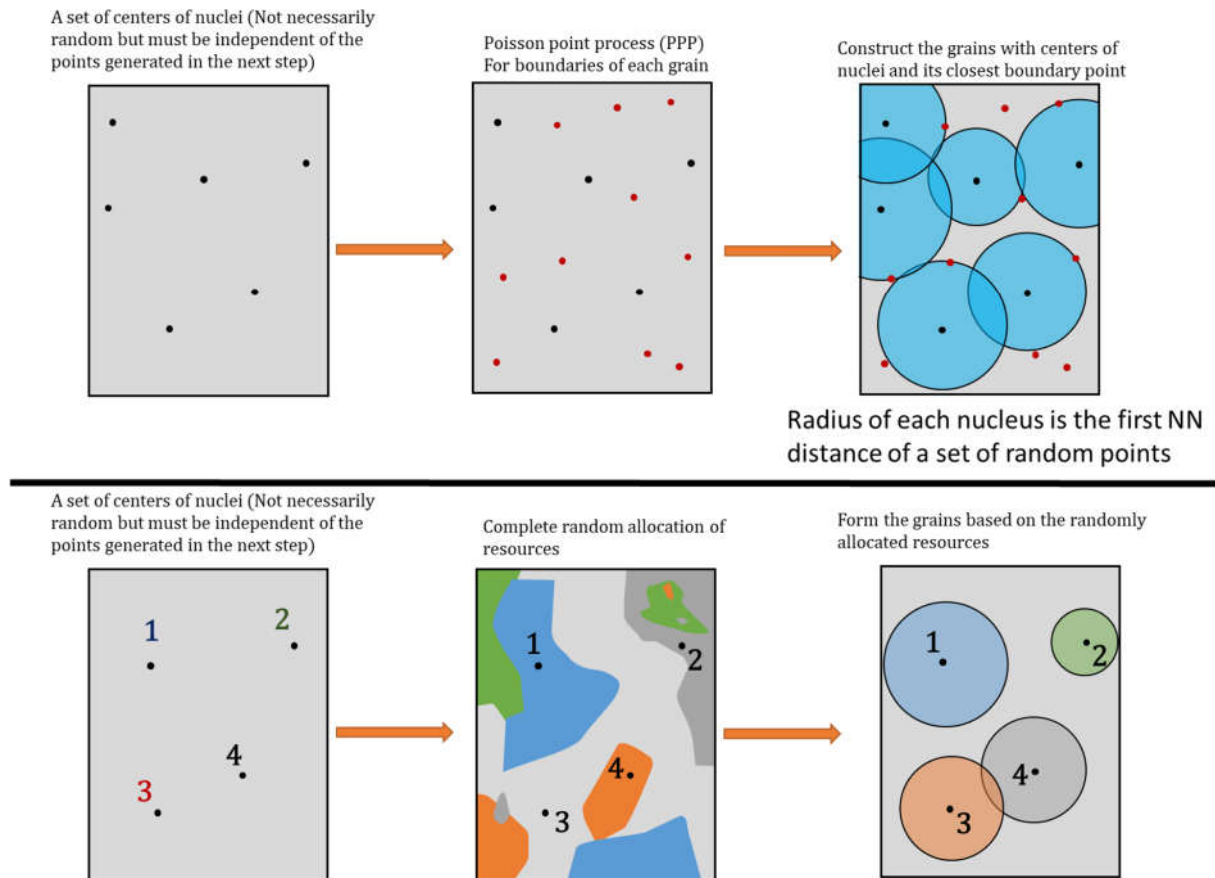

**Fig. B1** Generation of Weibull distribution. Top figure indicates the random radius scenario, which should fulfill  $k = 2$ . Bottom figures indicate the random allocation of resources scenario, which should also fulfill  $k = 2$ .

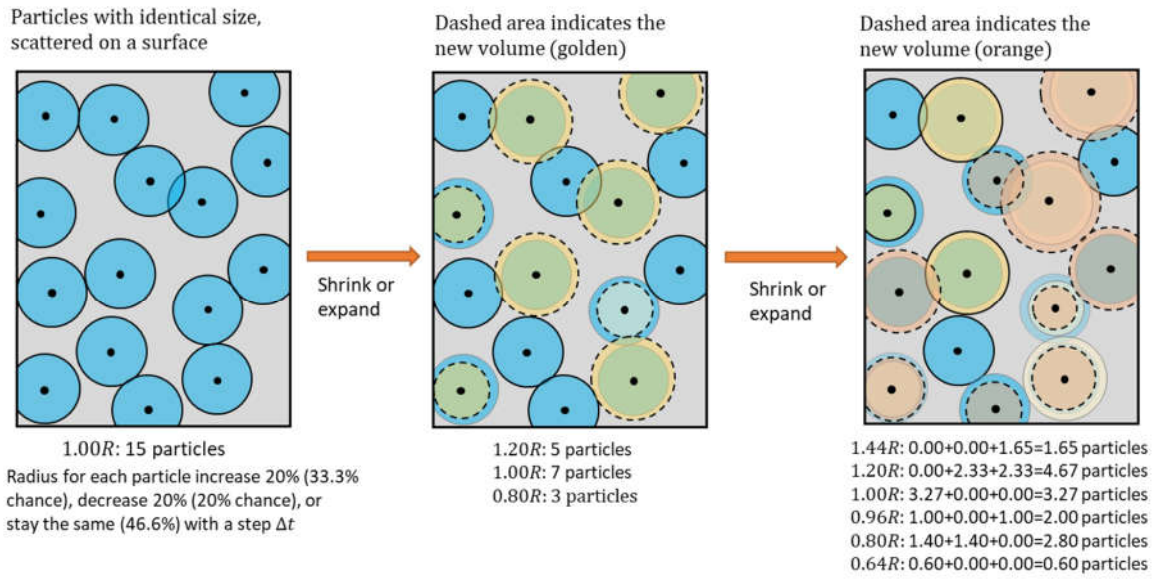

**Fig. B2** Illustration of the law of proportionate with a hypothetical scenario of 2D overlapping circles, and random but time-independent growth rate. At the long-time limit, the distribution of these circles should fulfill the Lognormal distribution, with moments related to the randomness of the grow/shrink operation. At each step,  $\langle \ln T \rangle = 0.333 \times \ln 1.2 + 0.2 \times \ln 0.8 = 0.016 > 0$ . Therefore, the average radius of the particles (and thus the total area of the particles) will gradually increase. The dispersion of each growth step is  $\langle (\ln T - \langle \ln T \rangle)^2 \rangle = 0.021$ . When the step  $n$  is large, this system should fulfill lognormal distribution with  $\mu = n \langle \ln T \rangle = 0.016n$  and  $\sigma^2 = n \langle (\ln T - \langle \ln T \rangle)^2 \rangle = 0.021n$ . Details in [Appendix-A](#).

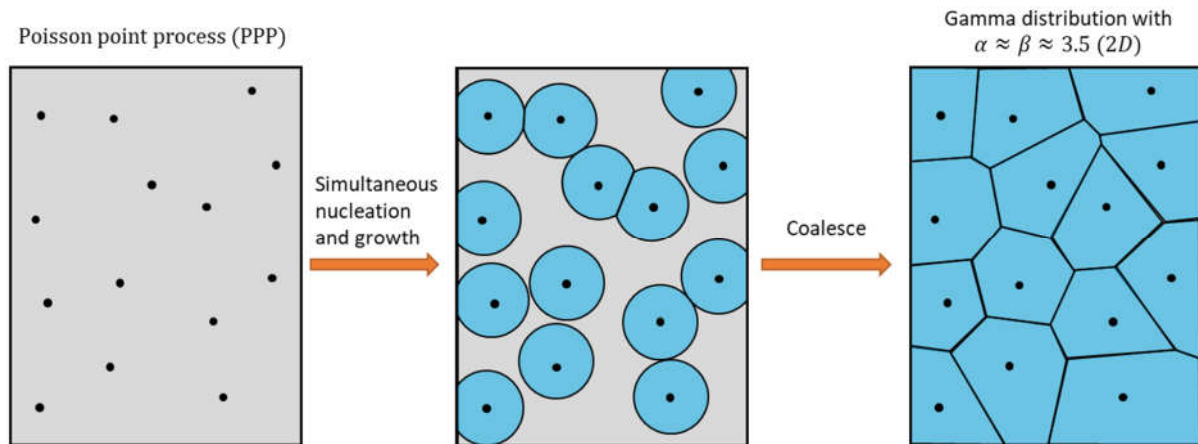

**Fig. B3** Illustration on one of the scenarios where Gamma distribution could represent the final grain size distribution. The empirical results for a 2D complete spatially random nuclei is a Gamma distribution of the area of the cells with  $\alpha \approx \beta \approx 3.5$ .

Appendix-C Comments on the Generalized Gamma distribution, the Lognormal distribution, the Weibull distribution, and the Gamma distribution

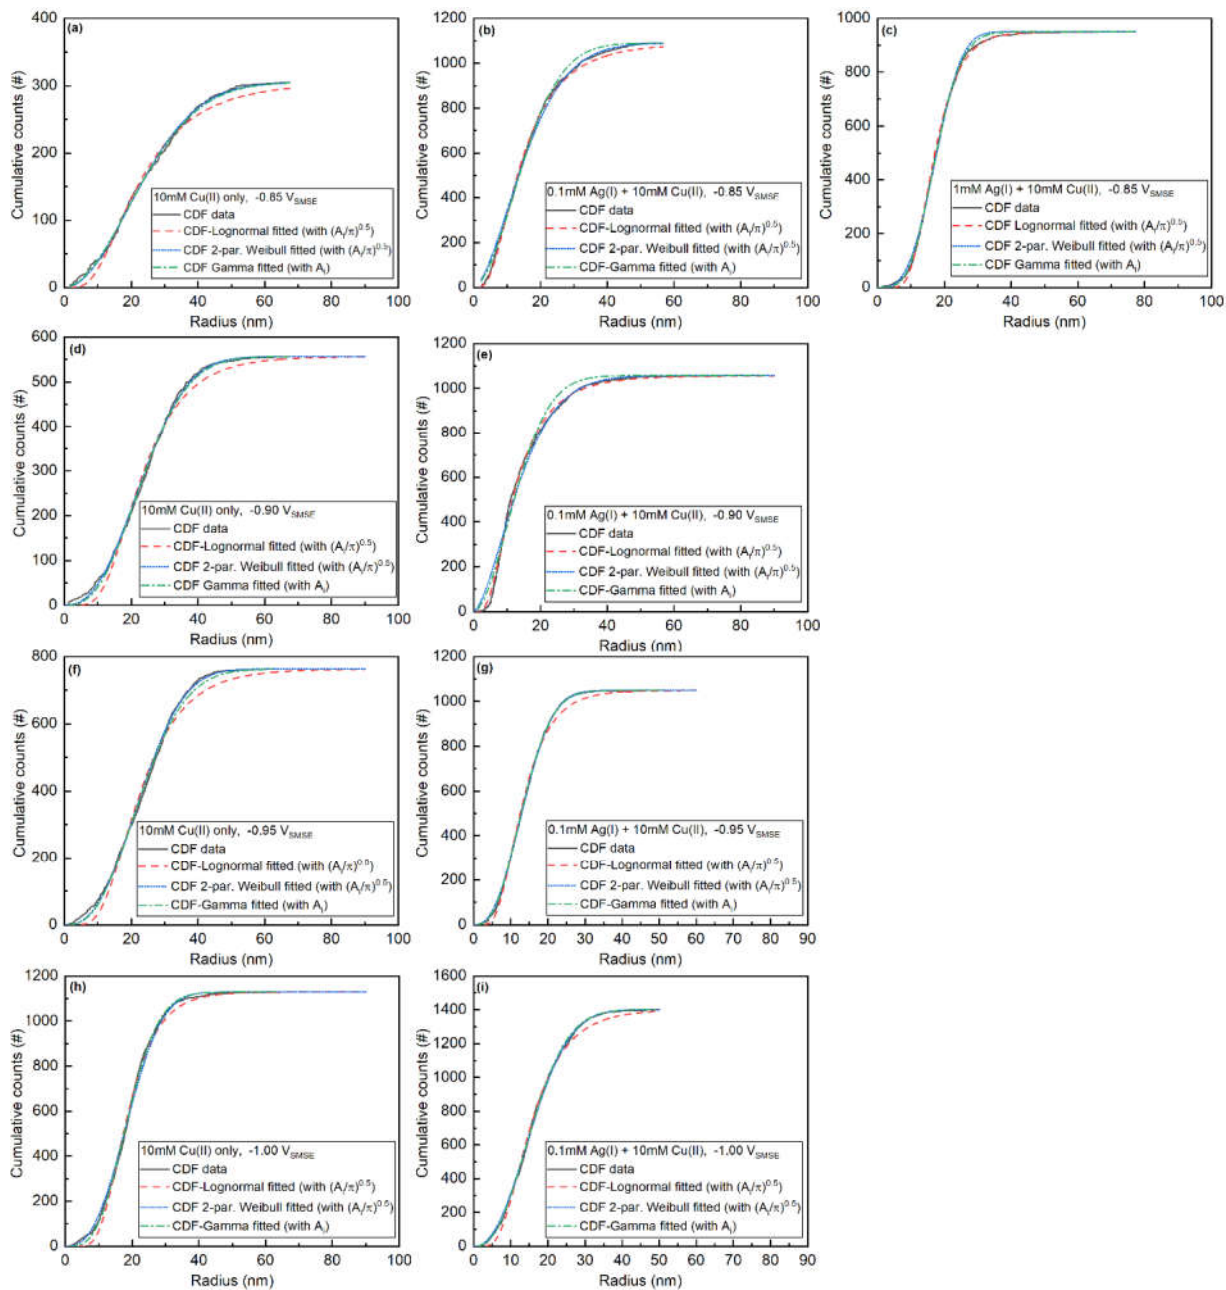

Fig.C CDF profile of the grain size distributions for the SEM images in Fig.4.

**Appendix-D: Statistical characteristics of the observed features**

| Particle size (in radius)           | Mean (nm) | Standard deviation (nm) | Skewness | Kurtosis |
|-------------------------------------|-----------|-------------------------|----------|----------|
| -0.85V<br>10mM Cu(II)               | 24.39     | 13.01                   | 0.49     | -0.13    |
| -0.90V<br>10mM Cu(II)               | 23.88     | 10.81                   | 0.43     | 0.67     |
| -0.95V<br>10mM Cu(II)               | 23.23     | 10.05                   | 0.20     | -0.06    |
| -1.00V<br>10mM Cu(II)               | 19.24     | 8.01                    | 0.79     | 2.13     |
| -0.85V<br>0.1mM Ag(I) + 10mM Cu(II) | 16.42     | 9.93                    | 1.12     | 1.10     |
| -0.90V<br>0.1mM Ag(I) + 10mM Cu(II) | 14.75     | 9.45                    | 1.77     | 5.29     |
| -0.95V<br>0.1mM Ag(I) + 10mM Cu(II) | 13.76     | 5.98                    | 0.71     | 1.42     |
| -1.00V<br>0.1mM Ag(I) + 10mM Cu(II) | 16.45     | 7.74                    | 0.71     | 0.75     |
| -0.85V<br>1.0mM Ag(I) + 10mM Cu(II) | 17.94     | 7.15                    | 1.48     | 7.03     |

| Voronoi cell size (in radius)       | Mean (nm) | Standard deviation (nm) | Skewness | Kurtosis |
|-------------------------------------|-----------|-------------------------|----------|----------|
| -0.85V<br>10mM Cu(II)               | 76.46     | 21.06                   | 0.12     | -0.13    |
| -0.90V<br>10mM Cu(II)               | 56.40     | 16.31                   | 0.06     | 0.19     |
| -0.95V<br>10mM Cu(II)               | 48.18     | 13.22                   | 0.13     | 0.01     |
| -1.00V<br>10mM Cu(II)               | 39.62     | 9.79                    | 0.53     | 0.83     |
| -0.85V<br>0.1mM Ag(I) + 10mM Cu(II) | 39.82     | 12.44                   | 0.51     | 0.65     |
| -0.90V<br>0.1mM Ag(I) + 10mM Cu(II) | 40.53     | 12.17                   | 1.21     | 3.09     |
| -0.95V<br>0.1mM Ag(I) + 10mM Cu(II) | 41.02     | 9.67                    | 0.49     | 0.74     |
| -1.00V<br>0.1mM Ag(I) + 10mM Cu(II) | 35.30     | 9.74                    | 0.55     | 0.66     |
| -0.85V<br>1.0mM Ag(I) + 10mM Cu(II) | 43.35     | 10.47                   | 1.00     | 3.91     |

| 1st NN distance | Mean (nm) | Standard deviation (nm) | Skewness | Kurtosis |
|-----------------|-----------|-------------------------|----------|----------|
|                 |           |                         |          |          |

|                                     |       |       |      |       |
|-------------------------------------|-------|-------|------|-------|
| -0.85V<br>10mM Cu(II)               | 87.01 | 28.43 | 0.50 | 0.96  |
| -0.90V<br>10mM Cu(II)               | 68.24 | 19.89 | 0.42 | 0.17  |
| -0.95V<br>10mM Cu(II)               | 60.73 | 15.38 | 0.57 | 0.12  |
| -1.00V<br>10mM Cu(II)               | 51.92 | 11.74 | 0.16 | 0.16  |
| -0.85V<br>0.1mM Ag(I) + 10mM Cu(II) | 50.05 | 15.87 | 0.45 | 0.20  |
| -0.90V<br>0.1mM Ag(I) + 10mM Cu(II) | 50.85 | 14.64 | 0.60 | 0.44  |
| -0.95V<br>0.1mM Ag(I) + 10mM Cu(II) | 51.92 | 14.58 | 0.40 | -0.09 |
| -1.00V<br>0.1mM Ag(I) + 10mM Cu(II) | 45.87 | 12.90 | 0.48 | 0.39  |
| -0.85V<br>1.0mM Ag(I) + 10mM Cu(II) | 58.13 | 14.43 | 0.75 | 1.23  |

| 2nd NN distance                     | Mean (nm) | Standard deviation (nm) | Skewness | Kurtosis |
|-------------------------------------|-----------|-------------------------|----------|----------|
| -0.85V<br>10mM Cu(II)               | 114.98    | 31.97                   | 0.74     | 0.66     |
| -0.90V<br>10mM Cu(II)               | 88.58     | 21.79                   | 0.46     | 0.03     |
| -0.95V<br>10mM Cu(II)               | 77.99     | 17.13                   | 0.33     | 0.15     |
| -1.00V<br>10mM Cu(II)               | 64.89     | 12.38                   | 0.26     | -0.11    |
| -0.85V<br>0.1mM Ag(I) + 10mM Cu(II) | 66.01     | 15.78                   | 0.28     | -0.28    |
| -0.90V<br>0.1mM Ag(I) + 10mM Cu(II) | 65.90     | 15.96                   | 0.51     | 0.16     |
| -0.95V<br>0.1mM Ag(I) + 10mM Cu(II) | 67.21     | 14.36                   | 0.28     | -0.30    |
| -1.00V<br>0.1mM Ag(I) + 10mM Cu(II) | 59.33     | 13.01                   | 0.32     | 0.19     |
| -0.85V<br>1.0mM Ag(I) + 10mM Cu(II) | 71.96     | 14.88                   | 0.49     | 0.83     |

| 5th NN distance | Mean (nm) | Standard deviation (nm) | Skewness | Kurtosis |
|-----------------|-----------|-------------------------|----------|----------|
|-----------------|-----------|-------------------------|----------|----------|

|                                     |        |       |      |       |
|-------------------------------------|--------|-------|------|-------|
| -0.85V<br>10mM Cu(II)               | 180.03 | 31.88 | 0.11 | 0.21  |
| -0.90V<br>10mM Cu(II)               | 137.45 | 23.46 | 0.28 | -0.31 |
| -0.95V<br>10mM Cu(II)               | 118.93 | 19.40 | 0.12 | -0.46 |
| -1.00V<br>10mM Cu(II)               | 97.52  | 13.57 | 0.11 | -0.18 |
| -0.85V<br>0.1mM Ag(I) + 10mM Cu(II) | 101.14 | 14.78 | 0.11 | -0.14 |
| -0.90V<br>0.1mM Ag(I) + 10mM Cu(II) | 100.85 | 17.02 | 0.13 | -0.12 |
| -0.95V<br>0.1mM Ag(I) + 10mM Cu(II) | 99.72  | 14.12 | 0.27 | 0.16  |
| -1.00V<br>0.1mM Ag(I) + 10mM Cu(II) | 88.71  | 12.19 | 0.11 | 0.21  |
| -0.85V<br>1.0mM Ag(I) + 10mM Cu(II) | 105.15 | 15.43 | 0.43 | 0.98  |

| 10th NN distance                    | Mean (nm) | Standard deviation (nm) | Skewness | Kurtosis |
|-------------------------------------|-----------|-------------------------|----------|----------|
| -0.85V<br>10mM Cu(II)               | 256.05    | 29.50                   | 0.55     | 0.79     |
| -0.90V<br>10mM Cu(II)               | 191.04    | 23.26                   | 0.14     | -0.48    |
| -0.95V<br>10mM Cu(II)               | 165.90    | 19.02                   | -0.12    | 0.50     |
| -1.00V<br>10mM Cu(II)               | 137.27    | 12.41                   | 0.09     | 0.36     |
| -0.85V<br>0.1mM Ag(I) + 10mM Cu(II) | 140.43    | 14.29                   | 0.07     | -0.31    |
| -0.90V<br>0.1mM Ag(I) + 10mM Cu(II) | 140.38    | 17.06                   | 0.24     | -0.22    |
| -0.95V<br>0.1mM Ag(I) + 10mM Cu(II) | 139.50    | 14.20                   | 0.39     | -0.24    |
| -1.00V<br>0.1mM Ag(I) + 10mM Cu(II) | 123.68    | 12.66                   | -0.02    | -0.14    |
| -0.85V<br>1.0mM Ag(I) + 10mM Cu(II) | 147.09    | 16.46                   | 0.34     | 0.13     |

| Coordination number                 | Mean (#) | Standard deviation (#) | Skewness | Kurtosis |
|-------------------------------------|----------|------------------------|----------|----------|
| -0.85V<br>10mM Cu(II)               | 6.004    | 7.287                  | 0.079    | -1.068   |
| -0.90V<br>10mM Cu(II)               | 5.919    | 10.638                 | -0.007   | -1.184   |
| -0.95V<br>10mM Cu(II)               | 5.953    | 11.589                 | 0.064    | -1.133   |
| -1.00V<br>10mM Cu(II)               | 5.956    | 12.832                 | 0.141    | -0.793   |
| -0.85V<br>0.1mM Ag(I) + 10mM Cu(II) | 5.989    | 14.326                 | 0.141    | -1.160   |
| -0.90V<br>0.1mM Ag(I) + 10mM Cu(II) | 5.945    | 13.323                 | 0.116    | -1.029   |
| -0.95V<br>0.1mM Ag(I) + 10mM Cu(II) | 5.951    | 11.965                 | 0.065    | -0.958   |
| -1.00V<br>0.1mM Ag(I) + 10mM Cu(II) | 5.952    | 15.083                 | 0.065    | -1.020   |
| -0.85V<br>1.0mM Ag(I) + 10mM Cu(II) | 5.984    | 10.611                 | 0.115    | -0.616   |

| Voronoi cell occupancy              | Mean (%area) | Standard deviation (%area) | Skewness | Kurtosis |
|-------------------------------------|--------------|----------------------------|----------|----------|
| -0.85V<br>10mM Cu(II)               | 11.81        | 9.15                       | 1.07     | 0.91     |
| -0.90V<br>10mM Cu(II)               | 19.14        | 11.20                      | 0.58     | 0.14     |
| -0.95V<br>10mM Cu(II)               | 24.75        | 13.45                      | 0.40     | -0.05    |
| -1.00V<br>10mM Cu(II)               | 24.37        | 11.82                      | 0.35     | 0.01     |
| -0.85V<br>0.1mM Ag(I) + 10mM Cu(II) | 16.55        | 11.66                      | 0.92     | 0.89     |
| -0.90V<br>0.1mM Ag(I) + 10mM Cu(II) | 13.32        | 9.61                       | 1.17     | 1.45     |
| -0.95V<br>0.1mM Ag(I) + 10mM Cu(II) | 11.53        | 6.29                       | 0.79     | 0.99     |
| -1.00V<br>0.1mM Ag(I) + 10mM Cu(II) | 21.92        | 11.47                      | 0.37     | -0.37    |
| -0.85V<br>1.0mM Ag(I) + 10mM Cu(II) | 17.13        | 6.75                       | 0.31     | 0.12     |

### Appendix-E Summary of fitting results

The cumulative distribution function (CDF) of the Lognormal distribution for feature  $R$ , with two fitting parameters  $(\gamma_L, k_L)$ :

$$F(R) = \frac{N_{tot}}{2} \left( 1 + \operatorname{erf} \left( \frac{k_L \ln(R/\gamma_L R_0)}{\sqrt{2}} \right) \right)$$

The CDF of the Weibull distribution for feature  $R$ , with two fitting parameters  $(\gamma_W, k_W)$ :

$$F(R) = N_{tot} \left( 1 - \exp \left( - \left( \frac{R}{\gamma_W R_0} \right)^{k_W} \right) \right)$$

The CDF of the Gamma distribution for feature  $A_R$ , with two fitting parameters  $(\alpha', \gamma_G)$ :

$$F(A_R) = \frac{N^{tot}}{\Gamma(\alpha')} \left( \frac{\gamma_G}{A_0} \right)^{\alpha'} \int_0^{A_R} A^{\alpha'-1} \exp \left( - \frac{\gamma_G A}{A_0} \right) dA$$

Note that  $R_0$  and  $A_0$  are the average value of the feature  $R$ . Using average radius  $R$  as an example,  $R_0$  is defined as:

$$R_0 = \frac{\sum_i R_i}{N^{tot}}$$

Where  $N^{tot}$  is total number of particles identified in the SEM image.

E1. Particle size

**Table-E1a** Fitting results of the particle size distribution of the deposits in **Fig.9**

| Particle size                        | Weibull ( <i>R</i> ) |         | Lognormal ( <i>R</i> ) |         | Gamma ( <i>R</i> <sup>2</sup> ) |           |
|--------------------------------------|----------------------|---------|------------------------|---------|---------------------------------|-----------|
|                                      | $\gamma_W$           | $k_W$   | $\gamma_L$             | $k_L$   | $\gamma_G$                      | $\alpha'$ |
| 10mM Cu(II), -0.85V                  | 1.12987              | 1.97089 | 0.90767                | 1.69584 | 0.90760                         | 0.92953   |
| 10mM Cu(II), -0.90V                  | 1.12542              | 2.43890 | 0.95418                | 2.18174 | 1.42000                         | 1.43376   |
| 10mM Cu(II), -0.95V                  | 1.12792              | 2.54006 | 0.95873                | 2.15880 | 1.35661                         | 1.41381   |
| 10mM Cu(II), -1.00V                  | 1.11847              | 2.65641 | 0.95424                | 2.54298 | 1.94835                         | 1.87777   |
| 10mM Cu(II) +<br>0.1mM Ag(I), -0.85V | 1.10658              | 1.63926 | 0.85323                | 1.55664 | 0.96770                         | 0.86407   |
| 10mM Cu(II) +<br>0.1mM Ag(I), -0.90V | 1.08407              | 1.55333 | 0.82237                | 1.60110 | 1.09406                         | 0.87531   |
| 10mM Cu(II) +<br>0.1mM Ag(I), -0.95V | 1.12282              | 2.47259 | 0.93677                | 2.17052 | 1.45187                         | 1.43831   |
| 10mM Cu(II) +<br>0.1mM Ag(I), -1.00V | 1.12401              | 2.24908 | 0.92584                | 2.03861 | 1.31336                         | 1.28070   |
| 10mM Cu(II) + 1mM<br>Ag(I), -0.85V   | 1.08417              | 3.16925 | 0.93590                | 2.75953 | 2.34142                         | 2.18333   |

**Table-E1b** Goodness of fitting (reflected by the value of reduced chi-square). Best-fitted results are highlighted in the table.

| Particle size ( <i>R</i> <sup>2</sup> ) | Lognormal        | Weibull          | Gamma            |
|-----------------------------------------|------------------|------------------|------------------|
| 10mM Cu(II), -0.85V                     | 76.82417         | <b>17.54486</b>  | <b>17.23666</b>  |
| 10mM Cu(II), -0.90V                     | 314.40398        | <b>33.70238</b>  | <b>59.57201</b>  |
| 10mM Cu(II), -0.95V                     | 678.58269        | <b>85.73903</b>  | <b>145.33532</b> |
| 10mM Cu(II), -1.00V                     | 704.44851        | <b>175.32914</b> | <b>184.43372</b> |
| 10mM Cu(II) + 0.1mM Ag(I), -<br>0.85V   | <b>214.48689</b> | <b>179.32499</b> | 337.10703        |
| 10mM Cu(II) + 0.1mM Ag(I), -<br>0.90V   | <b>439.99152</b> | 882.90216        | 1968.32421       |

|                                       |                 |                  |                  |
|---------------------------------------|-----------------|------------------|------------------|
| 10mM Cu(II) + 0.1mM Ag(I), -<br>0.95V | 400.91358       | <b>39.46859</b>  | <b>35.19554</b>  |
| 10mM Cu(II) + 0.1mM Ag(I), -<br>1.00V | 785.37822       | <b>187.71873</b> | <b>194.52263</b> |
| 10mM Cu(II) + 1mM Ag(I), -<br>0.85V   | <b>82.86434</b> | 205.1378         | <b>61.38359</b>  |

E2. Voronoi cell size

**Table E2a** Voronoi cell size fitted parameters

| Voronoi cell size                        | Weibull ( $R$ ) |         | Lognormal ( $R$ ) |         | Gamma ( $R^2$ ) |           |
|------------------------------------------|-----------------|---------|-------------------|---------|-----------------|-----------|
|                                          | $\gamma_W$      | $k_W$   | $\gamma_L$        | $k_L$   | $\gamma_G$      | $\alpha'$ |
| 10mM Cu(II), -<br>0.85V                  | 1.05289         | 4.09502 | 0.94885           | 3.61167 | 3.44035         | 3.47088   |
| 10mM Cu(II), -<br>0.90V                  | 1.05154         | 4.05645 | 0.93161           | 3.62056 | 3.30820         | 3.33436   |
| 10mM Cu(II), -<br>0.95V                  | 1.05133         | 4.21264 | 0.93442           | 3.76194 | 3.61725         | 3.63806   |
| 10mM Cu(II), -<br>1.00V                  | 1.04224         | 4.75414 | 0.94301           | 4.15507 | 4.56086         | 4.51131   |
| 10mM Cu(II) +<br>0.1mM Ag(I), -<br>0.85V | 1.03378         | 3.80001 | 0.91514           | 3.32303 | 3.08137         | 3.00337   |
| 10mM Cu(II) +<br>0.1mM Ag(I), -<br>0.90V | 1.01579         | 4.03190 | 0.91605           | 3.44566 | 3.62628         | 3.39955   |
| 10mM Cu(II) +<br>0.1mM Ag(I), -<br>0.95V | 1.03866         | 4.91986 | 0.94825           | 4.34650 | 5.00855         | 4.91622   |
| 10mM Cu(II) +<br>0.1mM Ag(I), -<br>1.00V | 1.03940         | 4.14152 | 0.93085           | 3.73009 | 3.60812         | 3.54397   |
| 10mM Cu(II) +<br>1mM Ag(I), -<br>0.85V   | 1.03547         | 5.00922 | 0.94511           | 4.17150 | 5.14593         | 5.02626   |

**Table E2b** Goodness of fitting (reflected by the value of reduced chi-square). Best fitted results are highlighted in the table.

| Voronoi cell size ( $R^2$ )           | Lognormal      | Weibull         | Gamma     |
|---------------------------------------|----------------|-----------------|-----------|
| 10mM Cu(II), -0.85V                   | <b>12.5026</b> | <b>13.48914</b> | 20.97627  |
| 10mM Cu(II), -0.90V                   | <b>4.06918</b> | 22.23003        | 78.47933  |
| 10mM Cu(II), -0.95V                   | <b>3.07649</b> | 41.92228        | 81.85295  |
| 10mM Cu(II), -1.00V                   | <b>0.50762</b> | 153.71785       | 91.80609  |
| 10mM Cu(II) + 0.1mM Ag(I), -<br>0.85V | <b>1.21227</b> | 300.57755       | 68.38255  |
| 10mM Cu(II) + 0.1mM Ag(I), -<br>0.90V | <b>0.26581</b> | 979.38649       | 244.08844 |
| 10mM Cu(II) + 0.1mM Ag(I), -<br>0.95V | <b>0.20933</b> | 463.80098       | 31.60001  |
| 10mM Cu(II) + 0.1mM Ag(I), -<br>1.00V | <b>0.39089</b> | 602.76994       | 79.01999  |
| 10mM Cu(II) + 1mM Ag(I), -<br>0.85V   | <b>0.25940</b> | 248.90517       | 16.12252  |

E3. 1st nearest neighbor distance

**Table E3a** 1st nearest neighbor distance fitted parameters

| 1st nearest neighbor distance            | Weibull ( $R$ ) |         | Lognormal ( $R$ ) |         | Gamma ( $R^2$ ) |           |
|------------------------------------------|-----------------|---------|-------------------|---------|-----------------|-----------|
|                                          | $\gamma_W$      | $k_W$   | $\gamma_L$        | $k_L$   | $\gamma_G$      | $\alpha'$ |
| 10mM Cu(II), -<br>0.85V                  | 1.07442         | 3.79652 | 0.96007           | 3.31323 | 3.19153         | 3.03407   |
| 10mM Cu(II), -<br>0.90V                  | 1.08401         | 3.89880 | 0.96985           | 3.36270 | 3.17277         | 3.13083   |
| 10mM Cu(II), -<br>0.95V                  | 1.07092         | 4.30908 | 0.96850           | 3.82405 | 4.00653         | 3.91415   |
| 10mM Cu(II), -<br>1.00V                  | 1.07188         | 5.07042 | 0.98463           | 4.46269 | 5.25076         | 5.22543   |
| 10mM Cu(II) +<br>0.1mM Ag(I), -<br>0.85V | 1.09141         | 3.55359 | 0.96632           | 3.08794 | 2.69432         | 2.66291   |
| 10mM Cu(II) +<br>0.1mM Ag(I), -<br>0.90V | 1.08170         | 3.89419 | 0.96704           | 3.37268 | 3.19299         | 3.13916   |
| 10mM Cu(II) +<br>0.1mM Ag(I), -<br>0.95V | 1.08255         | 3.93216 | 0.96950           | 3.45077 | 3.28200         | 3.24035   |
| 10mM Cu(II) +<br>0.1mM Ag(I), -<br>1.00V | 1.08349         | 4.01786 | 0.97187           | 3.47295 | 3.34836         | 3.31379   |
| 10mM Cu(II) +<br>1mM Ag(I), -<br>0.85V   | 1.06616         | 4.57076 | 0.96897           | 4.03372 | 4.46957         | 4.33880   |

**Table E3b** Goodness of fitting (reflected by the value of reduced chi-square). Best fitted results are highlighted in the table.

| 1st nearest neighbor distance<br>( $R^2$ ) | Lognormal       | Weibull   | Gamma            |
|--------------------------------------------|-----------------|-----------|------------------|
| 10mM Cu(II), -0.85V                        | <b>6.95421</b>  | 30.83670  | <b>13.04475</b>  |
| 10mM Cu(II), -0.90V                        | 46.43307        | 50.47370  | <b>17.13337</b>  |
| 10mM Cu(II), -0.95V                        | <b>56.33470</b> | 362.67955 | <b>145.20994</b> |
| 10mM Cu(II), -1.00V                        | <b>76.50000</b> | 383.51553 | <b>69.34010</b>  |
| 10mM Cu(II) + 0.1mM Ag(I), -<br>0.85V      | 182.92772       | 161.42956 | <b>40.17723</b>  |
| 10mM Cu(II) + 0.1mM Ag(I), -<br>0.90V      | 123.35001       | 239.17917 | <b>73.73904</b>  |
| 10mM Cu(II) + 0.1mM Ag(I), -<br>0.95V      | <b>72.13299</b> | 378.45089 | <b>122.48618</b> |
| 10mM Cu(II) + 0.1mM Ag(I), -<br>1.00V      | 297.70254       | 330.83611 | <b>105.23790</b> |
| 10mM Cu(II) + 1mM Ag(I), -<br>0.85V        | <b>63.78937</b> | 569.24604 | 213.37346        |

E4. 2nd nearest neighbor distance

**Table E4a** 2nd nearest neighbor distance fitted parameters

| 2nd nearest neighbor distance            | Weibull ( $R$ ) |         | Lognormal ( $R$ ) |         | Gamma ( $R^2$ ) |           |
|------------------------------------------|-----------------|---------|-------------------|---------|-----------------|-----------|
|                                          | $\gamma_W$      | $k_W$   | $\gamma_L$        | $k_L$   | $\gamma_G$      | $\alpha'$ |
| 10mM Cu(II), -<br>0.85V                  | 1.07091         | 4.10578 | 0.96333           | 3.53895 | 3.56725         | 3.45576   |
| 10mM Cu(II), -<br>0.90V                  | 1.07267         | 4.48601 | 0.99625           | 3.95179 | 4.2292          | 4.16438   |
| 10mM Cu(II), -<br>0.95V                  | 1.06925         | 5.21588 | 0.98386           | 4.49580 | 5.38779         | 5.35998   |
| 10mM Cu(II), -<br>1.00V                  | 1.06311         | 5.94565 | 0.98822           | 5.11797 | 6.88030         | 6.86881   |
| 10mM Cu(II) +<br>0.1mM Ag(I), -<br>0.85V | 1.07748         | 4.53512 | 0.97870           | 3.99441 | 4.25542         | 4.24055   |
| 10mM Cu(II) +<br>0.1mM Ag(I), -<br>0.90V | 1.06908         | 4.66717 | 0.97454           | 4.08097 | 4.52443         | 4.44175   |
| 10mM Cu(II) +<br>0.1mM Ag(I), -<br>0.95V | 1.06948         | 5.09897 | 0.98215           | 4.46090 | 5.27564         | 5.25186   |
| 10mM Cu(II) +<br>0.1mM Ag(I), -<br>1.00V | 1.06944         | 5.16101 | 0.98331           | 4.50187 | 5.37672         | 5.34460   |
| 10mM Cu(II) +<br>1mM Ag(I), -<br>0.85V   | 1.06522         | 5.45188 | 0.98364           | 4.76395 | 6.00192         | 5.95536   |

**Table E4b** Goodness of fitting (reflected by the value of reduced chi-square). Best fitted results are highlighted in the table.

| 2nd nearest neighbor distance<br>( $R^2$ ) | Lognormal        | Weibull   | Gamma            |
|--------------------------------------------|------------------|-----------|------------------|
| 10mM Cu(II), -0.85V                        | <b>6.51241</b>   | 18.83942  | <b>6.31931</b>   |
| 10mM Cu(II), -0.90V                        | <b>16.01587</b>  | 109.6247  | <b>32.22873</b>  |
| 10mM Cu(II), -0.95V                        | 69.83068         | 83.54715  | <b>27.12900</b>  |
| 10mM Cu(II), -1.00V                        | 157.68637        | 207.43057 | <b>57.21822</b>  |
| 10mM Cu(II) + 0.1mM Ag(I), -<br>0.85V      | <b>83.11630</b>  | 371.20762 | <b>101.73362</b> |
| 10mM Cu(II) + 0.1mM Ag(I), -<br>0.90V      | <b>42.24740</b>  | 386.37557 | <b>91.34833</b>  |
| 10mM Cu(II) + 0.1mM Ag(I), -<br>0.95V      | <b>52.64047</b>  | 352.10098 | <b>59.70631</b>  |
| 10mM Cu(II) + 0.1mM Ag(I), -<br>1.00V      | <b>120.10369</b> | 517.14598 | <b>84.19707</b>  |
| 10mM Cu(II) + 1mM Ag(I), -<br>0.85V        | <b>48.88195</b>  | 225.06924 | <b>29.13834</b>  |

E5. 5th nearest neighbor distance

**Table E5a** 5th nearest neighbor distance fitted parameters

| 5th nearest neighbor distance            | Weibull ( $R$ ) |         | Lognormal ( $R$ ) |         | Gamma ( $R^2$ ) |           |
|------------------------------------------|-----------------|---------|-------------------|---------|-----------------|-----------|
|                                          | $\gamma_W$      | $k_W$   | $\gamma_L$        | $k_L$   | $\gamma_G$      | $\alpha'$ |
| 10mM Cu(II), -<br>0.85V                  | 1.06169         | 6.51987 | 0.99348           | 5.65419 | 8.36297         | 8.36532   |
| 10mM Cu(II), -<br>0.90V                  | 1.05837         | 6.30849 | 0.98678           | 5.49028 | 7.86605         | 7.83635   |
| 10mM Cu(II), -<br>0.95V                  | 1.05900         | 6.63327 | 0.99174           | 5.83908 | 8.72582         | 8.74774   |
| 10mM Cu(II), -<br>1.00V                  | 1.04415         | 8.59413 | 0.99452           | 7.07614 | 12.78786        | 13.21044  |
| 10mM Cu(II) +<br>0.1mM Ag(I), -<br>0.85V | 1.05051         | 7.85100 | 0.99459           | 6.79256 | 11.81234        | 11.82001  |
| 10mM Cu(II) +<br>0.1mM Ag(I), -<br>0.90V | 1.06002         | 6.65224 | 0.99259           | 5.73625 | 8.50450         | 8.53542   |
| 10mM Cu(II) +<br>0.1mM Ag(I), -<br>0.95V | 1.04824         | 7.92292 | 0.99238           | 6.95991 | 12.39202        | 12.35253  |
| 10mM Cu(II) +<br>0.1mM Ag(I), -<br>1.00V | 1.0463          | 8.56217 | 0.99524           | 7.51823 | 14.36227        | 14.34471  |
| 10mM Cu(II) +<br>1mM Ag(I), -<br>0.85V   | 1.04563         | 8.02095 | 0.99076           | 6.97739 | 12.58901        | 12.48448  |

**Table E5b** Goodness of fitting (reflected by the value of reduced chi-square). Best fitted results are highlighted in the table.

| 5th nearest neighbor distance<br>( $R^2$ ) | Lognormal       | Weibull        | Gamma           |
|--------------------------------------------|-----------------|----------------|-----------------|
| 10mM Cu(II), -0.85V                        | 11.25316        | <b>4.16373</b> | <b>5.16774</b>  |
| 10mM Cu(II), -0.90V                        | <b>31.95991</b> | 87.94815       | <b>34.50869</b> |
| 10mM Cu(II), -0.95V                        | <b>41.86595</b> | 120.98114      | <b>25.90731</b> |
| 10mM Cu(II), -1.00V                        | <b>54.51746</b> | 201.79084      | <b>35.25198</b> |
| 10mM Cu(II) + 0.1mM Ag(I), -<br>0.85V      | <b>90.51654</b> | 168.75814      | <b>34.97838</b> |
| 10mM Cu(II) + 0.1mM Ag(I), -<br>0.90V      | 143.7591        | 116.78033      | <b>63.31640</b> |
| 10mM Cu(II) + 0.1mM Ag(I), -<br>0.95V      | <b>33.14437</b> | 260.67084      | <b>35.23964</b> |
| 10mM Cu(II) + 0.1mM Ag(I), -<br>1.00V      | <b>94.16697</b> | 508.74290      | <b>72.12255</b> |
| 10mM Cu(II) + 1mM Ag(I), -<br>0.85V        | <b>22.55905</b> | 259.41360      | <b>25.99566</b> |

E6. 10th nearest neighbor distance

**Table E6a** 10th nearest neighbor distance fitted parameters

| 10th nearest neighbor distance           | Weibull ( $R$ ) |          | Lognormal ( $R$ ) |          | Gamma ( $R^2$ ) |           |
|------------------------------------------|-----------------|----------|-------------------|----------|-----------------|-----------|
|                                          | $\gamma_W$      | $k_W$    | $\gamma_L$        | $k_L$    | $\gamma_G$      | $\alpha'$ |
| 10mM Cu(II), -<br>0.85V                  | 1.03068         | 10.45879 | 0.98944           | 9.34230  | 22.34817        | 21.97758  |
| 10mM Cu(II), -<br>0.90V                  | 1.04347         | 8.80726  | 0.99322           | 7.84437  | 15.60722        | 15.56108  |
| 10mM Cu(II), -<br>0.95V                  | 1.04063         | 10.63479 | 0.99934           | 9.18780  | 21.31828        | 21.40040  |
| 10mM Cu(II), -<br>1.00V                  | 1.03116         | 13.31070 | 0.99838           | 11.58346 | 33.76866        | 33.77081  |
| 10mM Cu(II) +<br>0.1mM Ag(I), -<br>0.85V | 1.03735         | 11.0321  | 0.99733           | 9.52835  | 22.99701        | 23.02839  |
| 10mM Cu(II) +<br>0.1mM Ag(I), -<br>0.90V | 1.04159         | 9.21163  | 0.99365           | 8.02439  | 16.44656        | 16.39098  |
| 10mM Cu(II) +<br>0.1mM Ag(I), -<br>0.95V | 1.03097         | 11.04403 | 0.99155           | 9.72763  | 24.19991        | 23.93456  |
| 10mM Cu(II) +<br>0.1mM Ag(I), -<br>1.00V | 1.03809         | 11.06642 | 0.99823           | 9.59049  | 23.23152        | 23.29686  |
| 10mM Cu(II) +<br>1mM Ag(I), -<br>0.85V   | 1.03884         | 9.90710  | 0.99396           | 8.58148  | 18.82291        | 18.75860  |

**Table E6b** Goodness of fitting (reflected by the value of reduced chi-square). Best fitted results are highlighted in the table.

| 10th nearest neighbor distance ( $R^2$ ) | Lognormal        | Weibull   | Gamma           |
|------------------------------------------|------------------|-----------|-----------------|
| 10mM Cu(II), -0.85V                      | <b>9.29948</b>   | 30.50684  | <b>11.79879</b> |
| 10mM Cu(II), -0.90V                      | <b>17.96297</b>  | 85.68206  | <b>23.27756</b> |
| 10mM Cu(II), -0.95V                      | 48.33878         | 41.26070  | <b>25.96019</b> |
| 10mM Cu(II), -1.00V                      | <b>60.78702</b>  | 176.62761 | <b>42.71459</b> |
| 10mM Cu(II) + 0.1mM Ag(I), -0.85V        | <b>65.63527</b>  | 174.73055 | <b>35.95656</b> |
| 10mM Cu(II) + 0.1mM Ag(I), -0.90V        | <b>13.53730</b>  | 210.42230 | <b>11.95216</b> |
| 10mM Cu(II) + 0.1mM Ag(I), -0.95V        | <b>76.29233</b>  | 553.88154 | <b>23.93456</b> |
| 10mM Cu(II) + 0.1mM Ag(I), -1.00V        | <b>108.68298</b> | 267.53559 | <b>46.63068</b> |
| 10mM Cu(II) + 1mM Ag(I), -0.85V          | <b>37.51865</b>  | 193.01249 | <b>33.57950</b> |

E7. Coordination number

**Table E7a** Coordination number fitted parameters

| Coordination number               | Weibull (#) |         | Lognormal (#) |         |
|-----------------------------------|-------------|---------|---------------|---------|
|                                   | $\gamma_W$  | $k_W$   | $\gamma_L$    | $k_L$   |
| 10mM Cu(II), -0.85V               | 1.05243     | 4.52299 | 0.98847       | 3.73148 |
| 10mM Cu(II), -0.90V               | 1.07828     | 4.24416 | 1.00623       | 3.32568 |
| 10mM Cu(II), -0.95V               | 1.05863     | 4.50610 | 0.99549       | 3.90793 |
| 10mM Cu(II), -1.00V               | 1.04041     | 4.86615 | 0.98445       | 4.33032 |
| 10mM Cu(II) + 0.1mM Ag(I), -0.85V | 1.04150     | 4.41768 | 0.98169       | 3.89484 |
| 10mM Cu(II) + 0.1mM Ag(I), -0.90V | 1.04143     | 4.45299 | 0.97718       | 3.90686 |
| 10mM Cu(II) + 0.1mM Ag(I), -0.95V | 1.04136     | 5.30097 | 0.99009       | 4.65095 |
| 10mM Cu(II) + 0.1mM Ag(I), -1.00V | 1.04731     | 4.62329 | 0.98578       | 3.96212 |
| 10mM Cu(II) + 1mM Ag(I), -0.85V   | 1.03349     | 5.41587 | 0.98603       | 4.82462 |

**Table E7b** Goodness of fitting (reflected by the value of reduced chi-square). Best fitted results are highlighted in the table.

| Coordination number (#)           | Lognormal         | Weibull           |
|-----------------------------------|-------------------|-------------------|
| 10mM Cu(II), -0.85V               | <b>2.00561E-4</b> | 3.74048E-4        |
| 10mM Cu(II), -0.90V               | 5.89064E-4        | <b>2.81596E-4</b> |
| 10mM Cu(II), -0.95V               | <b>8.89230E-5</b> | 1.96721E-4        |
| 10mM Cu(II), -1.00V               | <b>2.38815E-5</b> | 3.74904E-4        |
| 10mM Cu(II) + 0.1mM Ag(I), -0.85V | <b>4.97329E-5</b> | 3.00103E-4        |
| 10mM Cu(II) + 0.1mM Ag(I), -0.90V | <b>2.61589E-5</b> | 4.38461E-4        |
| 10mM Cu(II) + 0.1mM Ag(I), -0.95V | <b>7.72067E-5</b> | 2.87891E-4        |
| 10mM Cu(II) + 0.1mM Ag(I), -1.00V | <b>8.13826E-5</b> | 2.43556E-4        |
| 10mM Cu(II) + 1mM Ag(I), -0.85V   | <b>7.37872E-5</b> | 3.64700E-4        |

E8. Voronoi cell occupancy

**Table E8a** Voronoi cell occupancy fitted parameters

| Voronoi cell<br>occupancy                | Weibull ( $R$ ) |         | Lognormal ( $R$ ) |         | Gamma ( $R^2$ ) |           |
|------------------------------------------|-----------------|---------|-------------------|---------|-----------------|-----------|
|                                          | $\gamma_W$      | $k_W$   | $\gamma_L$        | $k_L$   | $\gamma_G$      | $\alpha'$ |
| 10mM Cu(II), -<br>0.85V                  | 1.09200         | 1.25809 | 0.77794           | 1.10347 | 1.38815         | 1.43862   |
| 10mM Cu(II), -<br>0.90V                  | 1.14749         | 1.7438  | 0.89458           | 1.49191 | 2.35974         | 2.48281   |
| 10mM Cu(II), -<br>0.95V                  | 1.15610         | 1.88019 | 0.91857           | 1.62022 | 2.71266         | 2.86440   |
| 10mM Cu(II), -<br>1.00V                  | 1.14272         | 2.23379 | 0.94268           | 1.94420 | 3.83393         | 3.99241   |
| 10mM Cu(II) +<br>0.1mM Ag(I), -<br>0.85V | 1.12282         | 1.36463 | 0.81687           | 1.18282 | 1.56321         | 1.64387   |
| 10mM Cu(II) +<br>0.1mM Ag(I), -<br>0.90V | 1.08159         | 1.36545 | 0.78319           | 1.20198 | 1.68412         | 1.69500   |
| 10mM Cu(II) +<br>0.1mM Ag(I), -<br>0.95V | 1.12544         | 1.92729 | 0.89914           | 1.68549 | 3.00344         | 3.07514   |
| 10mM Cu(II) +<br>0.1mM Ag(I), -<br>1.00V | 1.14935         | 1.90802 | 0.91346           | 1.64796 | 2.83528         | 2.96879   |
| 10mM Cu(II) +<br>1mM Ag(I), -<br>0.85V   | 1.11416         | 2.85079 | 0.95775           | 2.48311 | 2.67300         | 2.72143   |

**Table E8b** Goodness of fitting (reflected by the value of reduced chi-square). Best fitted results are highlighted in the table.

| Voronoi cell occupancy (% <i>area</i> ) | Lognormal        | Weibull          | Gamma            |
|-----------------------------------------|------------------|------------------|------------------|
| 10mM Cu(II), -0.85V                     | 83.01969         | <b>17.52204</b>  | <b>23.56213</b>  |
| 10mM Cu(II), -0.90V                     | 443.36252        | <b>96.96739</b>  | 197.33850        |
| 10mM Cu(II), -0.95V                     | 822.81991        | <b>145.32177</b> | 363.57820        |
| 10mM Cu(II), -1.00V                     | 1153.98342       | <b>111.66994</b> | 502.23432        |
| 10mM Cu(II) + 0.1mM Ag(I), -<br>0.85V   | 1225.90952       | <b>113.03177</b> | 261.30803        |
| 10mM Cu(II) + 0.1mM Ag(I), -<br>0.90V   | <b>240.22976</b> | 428.13348        | <b>278.25982</b> |
| 10mM Cu(II) + 0.1mM Ag(I), -<br>0.95V   | 510.59526        | <b>27.99956</b>  | 113.48462        |
| 10mM Cu(II) + 0.1mM Ag(I), -<br>1.00V   | 1990.49278       | <b>222.02641</b> | 758.58013        |
| 10mM Cu(II) + 1mM Ag(I), -<br>0.85V     | 286.26469        | <b>44.38022</b>  | <b>84.55129</b>  |

Appendix-F Mean and standard deviation of the Voronoi cell occupancy and the coordination number

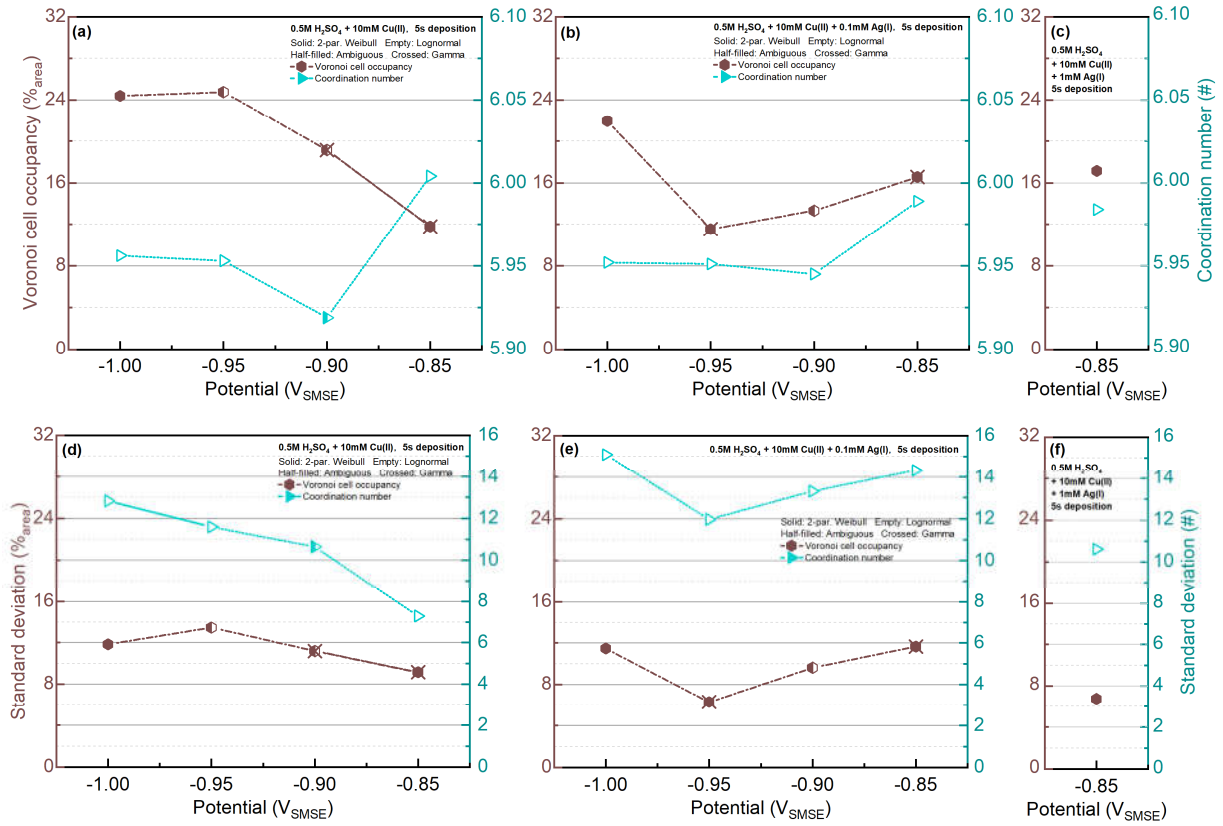

Fig.F1, Mean and standard deviation of Voronoi cell occupancy and coordination number.

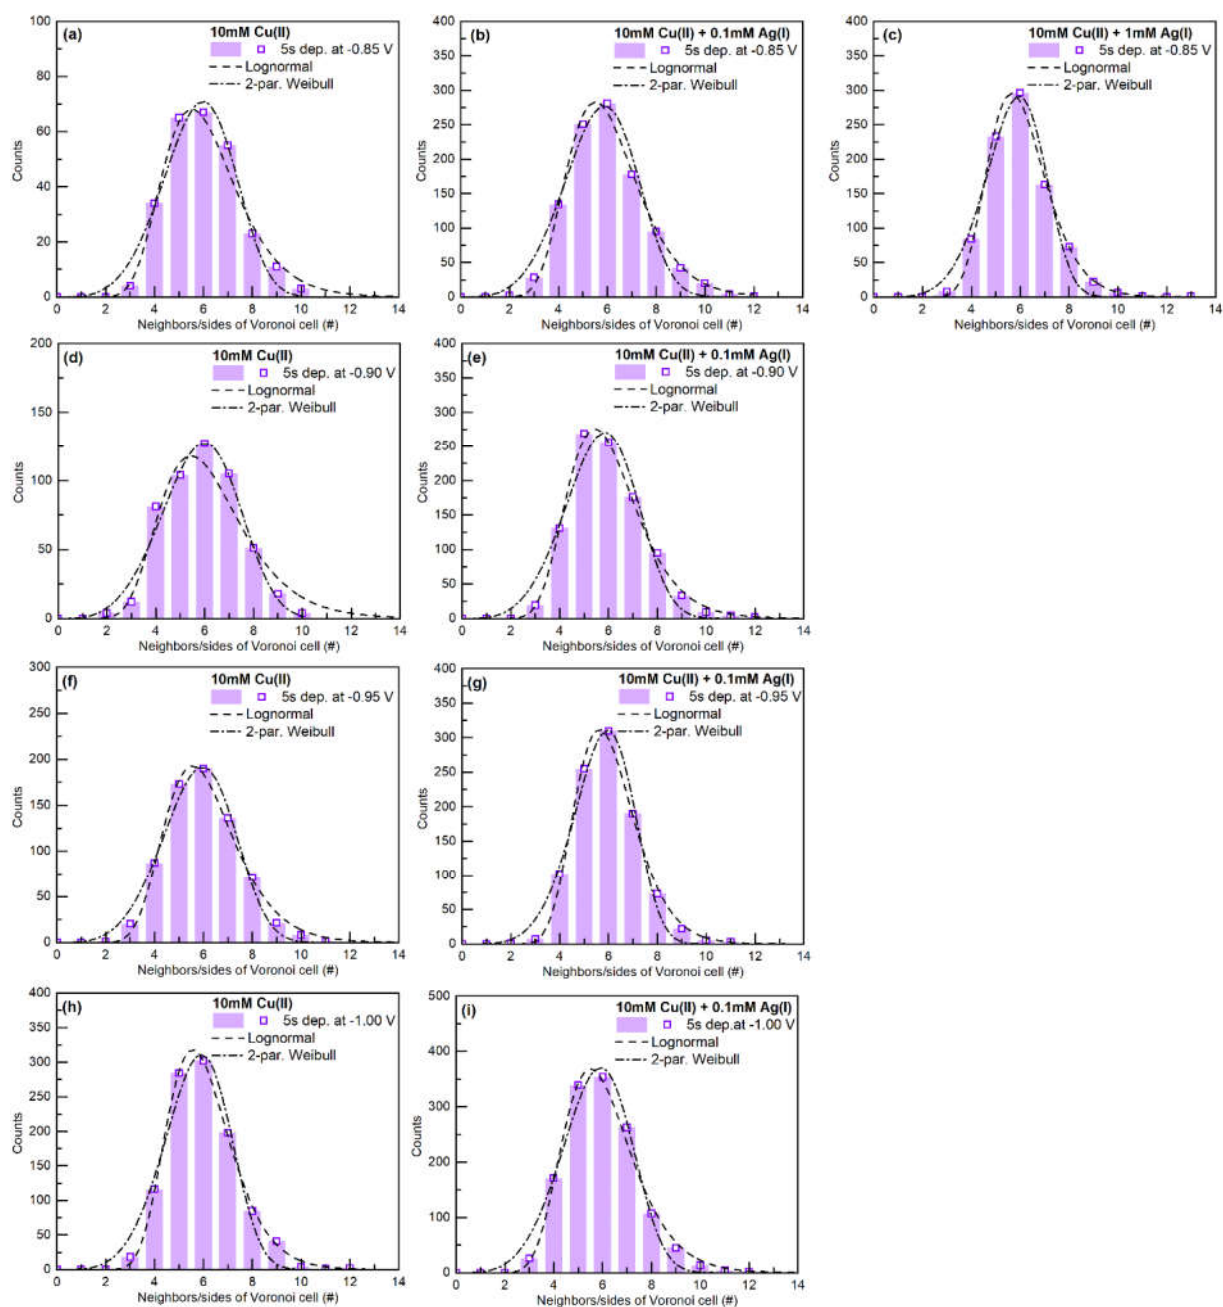

**Fig.F2** Voronoi cell coordination number. Supporting electrolyte is 0.5M H<sub>2</sub>SO<sub>4</sub>. The fitting was conducted directly with PDF. Reference electrode of SMSE was used for the potentials.
